# Supplementary material for: Graphene in the Fe3O4 nano-composite switching the negative influence of humic acid coating into an enhancing effect in the removal of arsenic from water
Source: Royal Society of Chemistry journal article supplement (doi:10.1039/c4ew00034j), 2014-11-05
Supplement: c4ew00034j1.pdf [file c4ew00034j1.pdf]

## Electronic Supporting Information

### **Graphene in the Fe<sub>3</sub>O<sub>4</sub> Nano-Composite Switching the Negative Influence of Humic acid Coating into an Enhancing Effect in the Removal of Arsenic from Water**

**Blain Paul \*, Vyom Parashar, Ajay Mishra**

\*Department of Applied Chemistry, University of Johannesburg, P.O. Box 17011, Doornfontein, 2028, South Africa

#### **Lattice Fringes Spectrum**

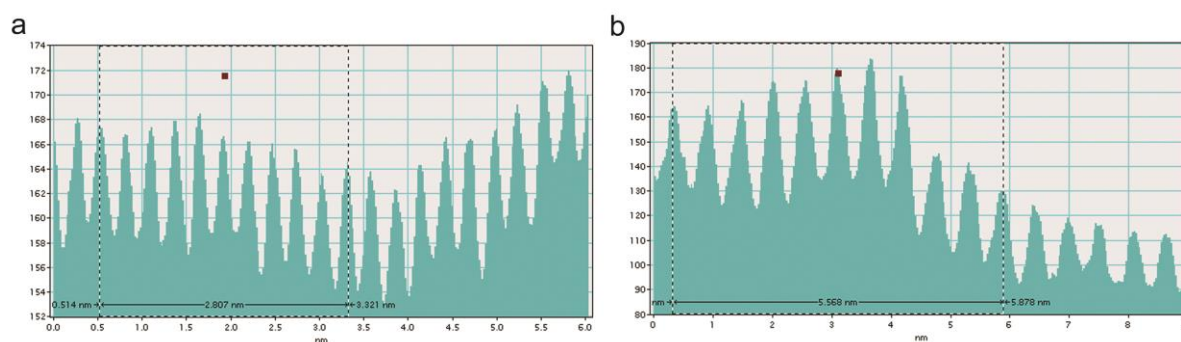

Fig. S1 (a) and (b) are the spectrum corresponding to the periodic fringes related to the lattice planes on Fe<sub>3</sub>O<sub>4</sub> nanoparticles observed in TEM images of graphene based Fe<sub>3</sub>O<sub>4</sub> nano-composite.
